# Supplementary material for: Positional Distribution of Fatty Acids in Processed Chinook Salmon Roe Lipids Determined by 13C Magnetic Resonance Spectroscopy (NMR)
Source: Molecules. 2023 Jan 3;28(1):454. doi: 10.3390/molecules28010454 (PMC9824307; doi:10.3390/molecules28010454)
Supplement: Supplementary file 1 [file molecules-28-00454-s001.zip › molecules-2098874-supplementary.pdf]

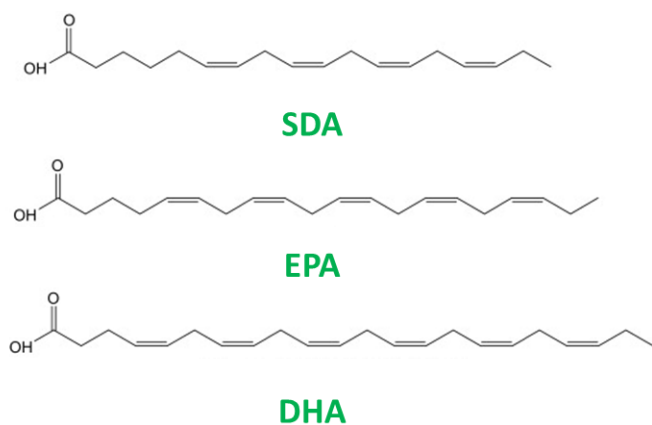

**Figure S1: Structure of major n-3 fatty acids.**

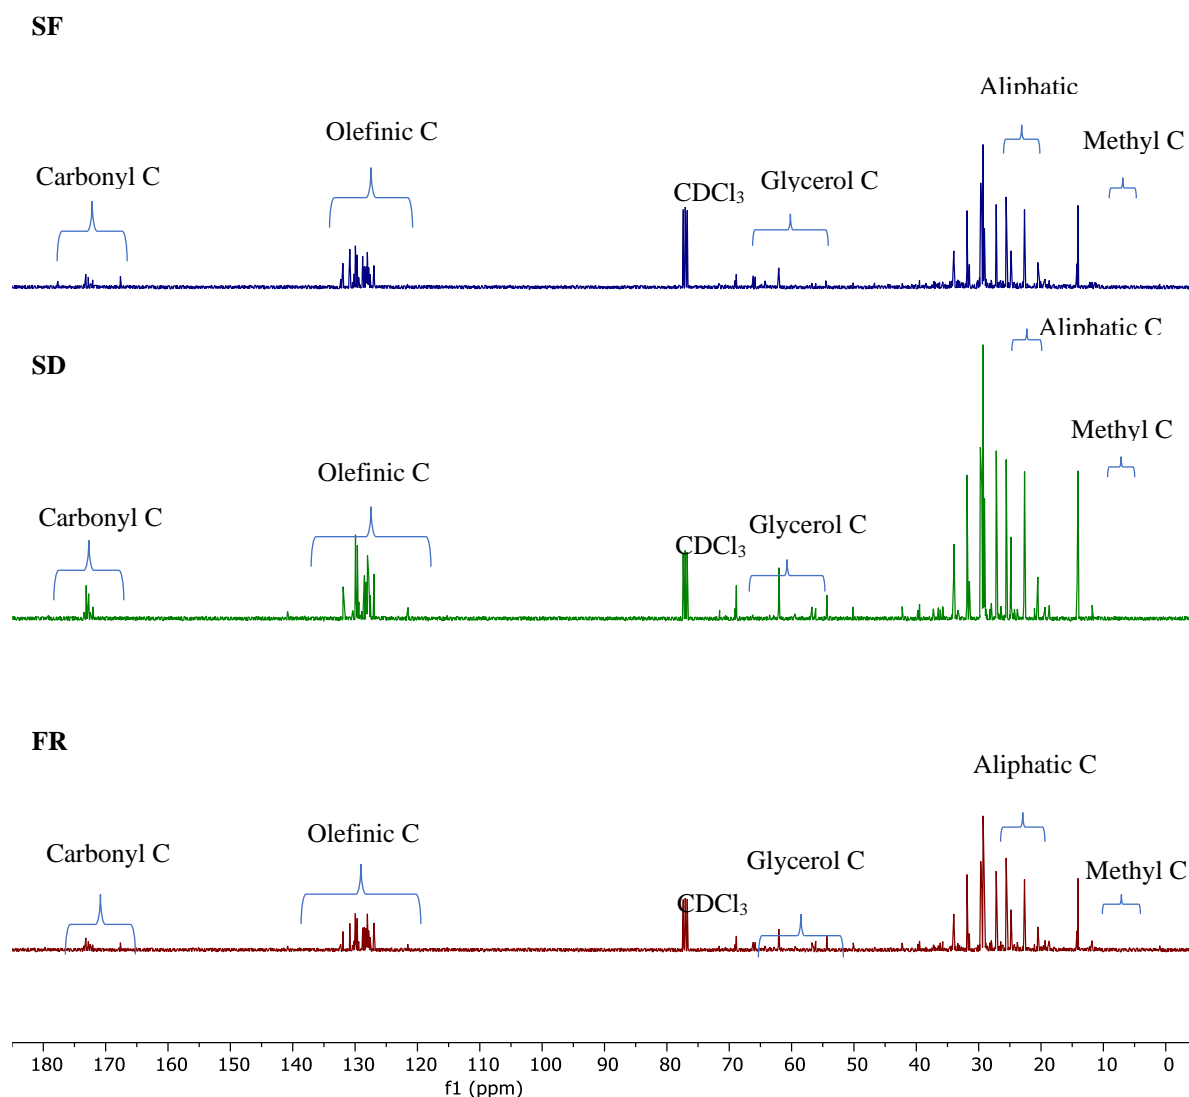

**Figure S2. <sup>13</sup>C NMR full spectra of lipid extracted from fresh (FR), salted dried (SD) and fermented (SF) salmon roe. A) FR salmon roe lipid; B) SD salmon roe lipid; C) SF salmon roe lipid. Abbreviations: FR= fresh roe; SD= salted-dried; SF=salted-fermented; and C= carbon**

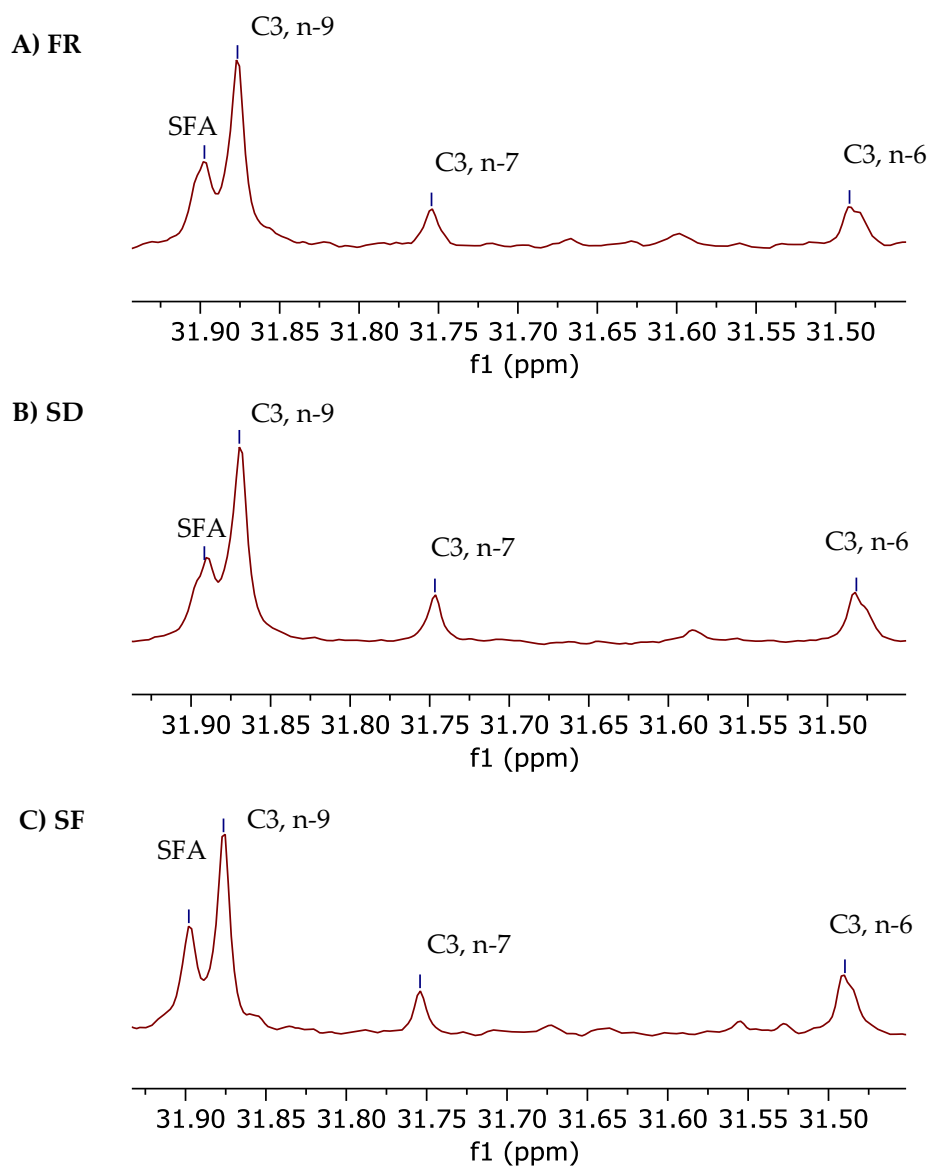

**Figure S3: Aliphatic region of lipid of fresh, salted and fermented salmon roe by  $^{13}\text{C}$ -NMR. The region where carbon number 3 (C3) gives signal from the methyl end. A). FR= fresh salmon roe lipid extract; B). SD= salted-dried salmon roe lipid extract; C). SF=salted-fermented salmon roe lipid extract. Chemical shift ( $\delta$ ) regions were 32.0 – 31.0 ppm.**

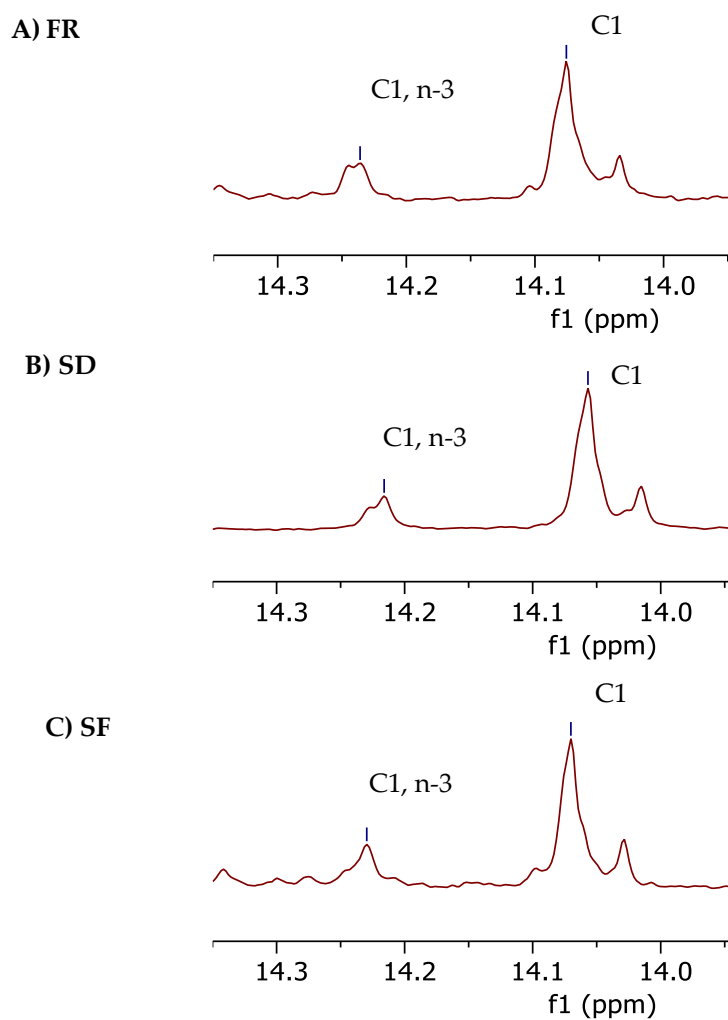

**Figure S4.** Expansions of  $^{13}\text{C}$ -NMR spectra of lipids extracted from fresh, salted and fermented salmon roe in the methyl end region, where C1 gives a signal. A). FR= fresh salmon roe lipid extract; B). SD= salted salmon roe lipid extract; C). SF= Fermented salmon roe lipid extract.  $\delta$  = chemical shift (ppm).

**Table S1. The regions and assignments of  $^{13}\text{C}$ -NMR that can be noticed from the spectra of salmon roe lipids.**

| Regions                             | Functional groups                  | Chemical shift    |
|-------------------------------------|------------------------------------|-------------------|
| a) carbonyl atoms region            | -C=O                               | 174.3 – 172.6 ppm |
| b) double bonds/olefinic region     | -C=C-                              | 132.0 – 126.0 ppm |
| c) glycerol backbone region         | -COO-CH <sub>3</sub>               | 72.0 – 60.0 ppm   |
| d) aliphatic group region           | -(CH <sub>2</sub> ) <sub>n</sub> - | 32.0 – 20.0 ppm   |
| e) chain ending methyl group region | -CH <sub>3</sub>                   | ~14.0 ppm         |
